# Supplementary material
Source: Research Square preprint supplement (doi:10.21203/rs.3.rs-8664554/v1)
Supplement: Supplementary file 1 [file d2eb1389d29303f6a4ef3a5d.docx]

# **Heart Failure Diagnosis Codes**

The following SNOMED diagnosis codes were used to identify ED diagnoses of heart failure: 1234906013, 1235017018, 129475013, 1368880013, 139475013, 139482012, 141303019, 141306010, 147247018, 201199018, 206703015, 2577902015, 2840337016, 2816275019, 300179017, 493287011, 493288018, 493289014, 70653017.
